# Supplementary material for: High-throughput Characterization of HIV-1 Reservoir Reactivation Using a Single-Cell-in-Droplet PCR Assay
Source: PubMed Central journal article supplement — eBioMedicine. 2017 May 4;20:217–29. doi: 10.1016/j.ebiom.2017.05.006 (PMC5478213; doi:10.1016/j.ebiom.2017.05.006), 2017-05-04
Supplement: mmc1.pdf [file mmc1.pdf]

## SUPPLEMENTARY INFORMATION

**Supplementary Table 1.** scdPCR mastermix and thermocycling conditions.

|                       | msRNA                                                                                |                                                     |                             | usRNA                       |                                                     |                             |
|-----------------------|--------------------------------------------------------------------------------------|-----------------------------------------------------|-----------------------------|-----------------------------|-----------------------------------------------------|-----------------------------|
|                       | Conc.                                                                                |                                                     | $\mu\text{L} /$<br>Reaction | Conc.                       |                                                     | $\mu\text{L} /$<br>Reaction |
| Enzyme                | 2x                                                                                   | One-Step RT ddPCR Supermix<br>(Biorad) <sup>a</sup> | 10                          | 2x                          | One-Step RT ddPCR Supermix<br>(Biorad) <sup>a</sup> | 10                          |
| Mn<br>Acetate         | 25 mM                                                                                |                                                     | 0.8                         | 25 mM                       |                                                     | 0.8                         |
| Forward<br>Primer     | 10 $\mu\text{M}$                                                                     | ks1: 5'-CTTAGGCATCTC<br>CTATGGCAGGAA <sup>c</sup>   | 0.12                        | 100 $\mu\text{M}$           | 5'- TACTGACGCTCTCGCACC <sup>d</sup>                 | 0.12                        |
| Reverse<br>Primer     | 10 $\mu\text{M}$                                                                     | mf-83: 5'-GGATCTGTCTCTGT<br>CTCTCTCTCCACC           | 0.12                        | 100 $\mu\text{M}$           | 5'-TCTCGACGCAGGACTCG                                | 0.12                        |
| Probe                 | 10 $\mu\text{M}$                                                                     | ks2: 5'-FAM-TTCCTTCGGGCC<br>TGTCGGGTCCC             | 0.5                         | 5 $\mu\text{M}$             | FAM-CTCTCTCCTTCTAGCCTC                              | 1                           |
| Cell<br>suspension    | 10 <sup>6</sup><br>cells/mL                                                          |                                                     | 10                          | 10 <sup>6</sup><br>cells/mL |                                                     | 10                          |
| Lysis<br>buffer       |                                                                                      |                                                     | 2 <sup>b</sup>              |                             |                                                     | 2 <sup>b</sup>              |
| Cycling<br>conditions | 60°C, 30 min / 95°C, 5 min / 94°C, 30 sec; 60°C, 1 min 40x / 98°C, 10 min / 4°C hold |                                                     |                             |                             |                                                     |                             |

<sup>a</sup> Samples from Participant B and C were used using the updated BioRad One-Step RT-ddPCR Advanced Kit which eliminates that need for additional Mn Acetate and uses additional DTT. Assay volumes and concentrations of primer and probes were kept the same.

<sup>b</sup> lysis buffer added immediately prior to cell encapsulation

<sup>c</sup> {Kiselinova, 2014 #1131}

<sup>d</sup> {Malnati, 2008 #449}

**Supplementary Table 2.** Percent decrease in cell viability 24 hours following T-cell receptor or romidepsin pulse stimulation compared with unstimulated cells

| Participant | % Decrease in Live Cells                                            |                     |
|-------------|---------------------------------------------------------------------|---------------------|
|             | T-cell receptor<br>( $\alpha$ CD3/<br>$\alpha$ CD28)<br>stimulation | Romidepsin<br>pulse |
| A           | 1.3                                                                 | 0                   |
| B           | 1.9                                                                 | 4.6                 |
| C           | 4.4                                                                 | 9.8                 |
| D           | 2.7                                                                 | 13.3                |
| E           | 4.1                                                                 | 16.7                |
| F           | 5.2                                                                 | 16.5                |

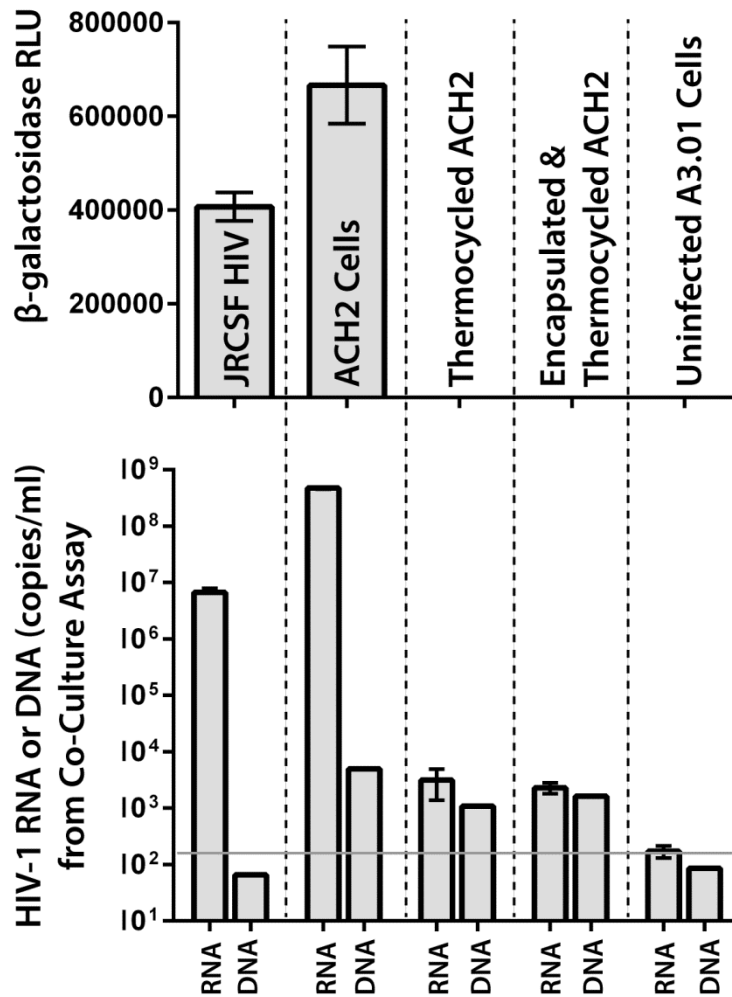

**Supplementary Figure 1. Infectivity and replication capacity of infected ACH2 cells following scdPCR.**

High levels of β-galactosidase, a surrogate for HIV-1 entry into TZM-bl cells, were observed in cell infectivity experiments incorporating unmanipulated ACH2 cells or infectious HIV-1 JRCSF; no β-galactosidase activity was detected in experiments including either encapsulated or non-encapsulated, thermocycled ACH2 cells (top). Encapsulated, thermocycled ACH2 cells did not lead to increasing HIV-1 RNA in supernatants over 14 days of co-culture, with RNA levels being similar to DNA in supernatants derived from dead or lysed cells (bottom).

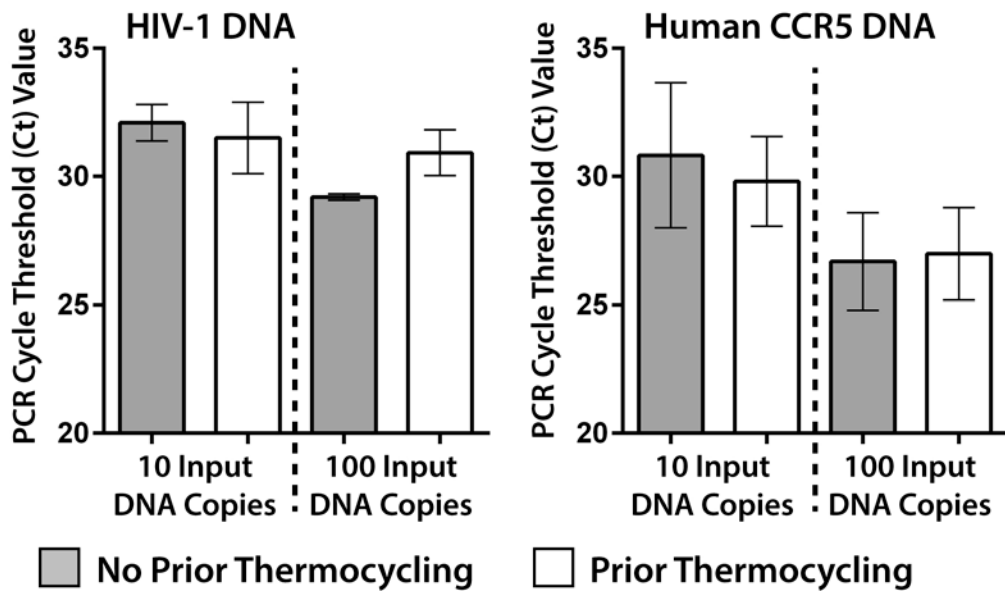

**Supplementary Figure 2. Real-time PCR cycle threshold values for the detection of genomic HIV-1 integrase or human CCR5 DNA do not decrease following thermocycling using scdPCR conditions.** Error bars represent standard error from duplicate experiments. These results suggest that secondary genomic DNA targets can be quantified following scdPCR screening for cells harboring HIV-1 RNA.

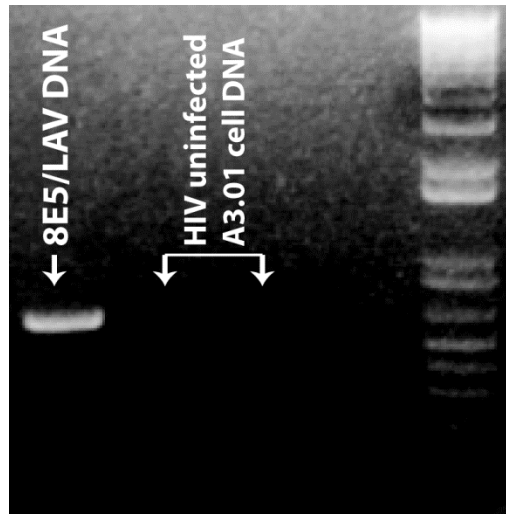

**Supplementary Figure 3. Agarose gel electrophoretic band of HIV-1 envelope DNA amplified from genomic DNA extracted from isolated droplets containing 8E5/LAV or A3.01 cells following scdPCR. DNA was only able to be obtained from fluorescent droplets containing infected 8E5/LAV cells.**
